# Supplementary material for: High Variability in Implementation of Selective-Prevention Services for Cardiometabolic Diseases in Five European Primary Care Settings
Source: PubMed Central journal article supplement (PMC7730804; doi:10.3390/ijerph17239080), 2020-12-04
Supplement: ijerph-17-09080-s001.pdf [file ijerph-17-09080-s001.pdf]

**Table 1.** Procedural aspects per participating country.

|                                 | <b>Czech Republic</b>                                                                                | <b>Denmark</b>                               | <b>Greece</b>                                                                                        | <b>Netherlands</b>                                          | <b>Sweden</b>                                 |
|---------------------------------|------------------------------------------------------------------------------------------------------|----------------------------------------------|------------------------------------------------------------------------------------------------------|-------------------------------------------------------------|-----------------------------------------------|
| Number of practices             | 10                                                                                                   | 2                                            | 3                                                                                                    | 5                                                           | 1                                             |
| Average practice size (persons) | 1900                                                                                                 | 1600                                         | 1500                                                                                                 | 2350                                                        | 20,000                                        |
| Practice selection              | Purposive                                                                                            | Purposive                                    | Purposive                                                                                            | Random                                                      | Purposive                                     |
| Number of invited participants  | 200                                                                                                  | 200                                          | 200                                                                                                  | 200                                                         | 200                                           |
| Participant selection           | Consecutive                                                                                          | Random                                       | Consecutive                                                                                          | Random                                                      | Consecutive                                   |
| Participant age group           | 40–65                                                                                                | 40–65                                        | 40–65                                                                                                | 45–65                                                       | 40–65                                         |
| Participant eligibility         | - No CMD diagnosis                                                                                   | -No CMD diagnosis<br>- No CMD treatment      | - No CMD diagnosis                                                                                   | - No CMD diagnosis<br>- No CMD treatment                    | - No CMD diagnosis<br>- No CMD treatment      |
| CVD risk assessment tool        | European Heart SCORE (country adjusted): 2016 ESC/EAS Guidelines for the Management of Dyslipidemias | Modified Heartscore BMI score                | European Heart SCORE (country adjusted): 2016 ESC/EAS Guidelines for the Management of Dyslipidemias | Dutch Prevention Consultation Cardiometabolic Risk (PC CMR) | Svenska Score (SCORE Sweden)                  |
| Patient approach                | 1-step (concurrent invitation and assessment)                                                        | 2-step (separate invitation from assessment) | 1-step (concurrent invitation and assessment)                                                        | 2-step (separate invitation from assessment)                | 1-step (concurrent invitation and assessment) |
| Demographic characteristics     | √                                                                                                    | √                                            | √                                                                                                    | √                                                           | √                                             |
| Physical activity               | √                                                                                                    | √                                            | √                                                                                                    | √                                                           | √                                             |
| Smoking and alcohol consumption | √                                                                                                    | √                                            | √                                                                                                    | √                                                           | √                                             |
| Dietary habits                  | √                                                                                                    | √                                            | √                                                                                                    | √                                                           | √                                             |
| Participant's assessment        | √                                                                                                    |                                              | √                                                                                                    |                                                             | √                                             |

|                                                |   |  |   |   |
|------------------------------------------------|---|--|---|---|
| of the intervention                            |   |  |   |   |
| Willingness to change behavior                 | √ |  | √ | √ |
| Barriers to undertaking risk-reduction actions | √ |  | √ | √ |

Abbreviations: **CMD**: cardiometabolic disease; **CVD**: cardio-vascular disease.

**Table 2.** Demographic characteristics of participants who completed CVD-risk assessment (n = 398).

| Variable                                           | Czech Republic<br>(N = 174) | Denmark<br>(N = 58) | Greece<br>(N = 70) | Netherlands<br>(N = 57) | Sweden<br>(N = 39) |
|----------------------------------------------------|-----------------------------|---------------------|--------------------|-------------------------|--------------------|
| <b>Gender, n (%)</b>                               |                             |                     |                    |                         |                    |
| Female                                             | 111 (63.8)                  | 27 (46.6)           | 27 (37.1)          | 32 (55.9)               | 27 (69.2)          |
| Male                                               | 63 (36.2)                   | 31 (53.4)           | 43 (62.9)          | 25 (44.1)               | 12 (30.8)          |
| <b>Age (years), mean (SD)</b>                      | 49.8 (8.9)                  | 55.7 (6.4)          | 53.6 (8.9)         | 53.2 (10.1)             | 51.1 (6.3)         |
| <b>Education, n (%)</b>                            |                             |                     |                    |                         |                    |
| None                                               | 0 (0)                       | 0 (0)               | 5 (7.1)            | 0 (0)                   | 0 (0)              |
| Primary                                            | 1 (0.6)                     | 1 (2)               | 13 (18.6)          | 1 (1.8)                 | 0 (0)              |
| Secondary                                          | 28 (16.3)                   | 8 (16)              | 35 (50)            | 8 (14)                  | 0 (0)              |
| College/University                                 | 143 (83.1)                  | 41 (82)             | 17 (24.3)          | 48 (84.2)               | 39 (100)           |
| <b>Work status, n (%)</b>                          |                             |                     |                    |                         |                    |
| Full time                                          | 117 (89.3)                  | 35 (60.4)           | 38 (54.2)          | 29 (50.8)               | 36 (92.3)          |
| Part time                                          | 29 (16.7)                   | 10 (17.2)           | 13 (18.6)          | 16 (28.1)               | 2 (5.1)            |
| Pensioner                                          | 8 (4.6)                     | 8 (13.8)            | 9 (12.9)           | 9 (15.8)                | 1 (2.6)            |
| Unemployed                                         | 4 (2.3)                     | 3 (5.2)             | 10 (14.3)          | 2 (3.5)                 | 0 (0)              |
| Disabled                                           | 16 (9.2)                    | 2 (3.4)             | 0 (0)              | 1 (1.8)                 | 0 (0)              |
| <b>Health insurance, n (%)</b>                     |                             |                     |                    |                         |                    |
| Yes                                                | 166 (95.4)                  | 24 (41.4)           | 53 (76.9)          | 57 (100)                | 27 (69.2)          |
| No                                                 | 3 (1.7)                     | 4 (6.9)             | 15 (21.7)          | 0 (0)                   | 7 (17.9)           |
| Not applicable                                     | 5 (2.9)                     | 30 (51.7)           | 1 (1.4)            | 0 (0)                   | 5 (12.8)           |
| <b>Income compared to country's average, n (%)</b> |                             |                     |                    |                         |                    |
| Lower                                              | 33 (19.1)                   | 20 (34.4)           | 46 (65.7)          | 4 (7)                   | 3 (7.7)            |
| Corresponding                                      | 55 (31.8)                   | 21 (36.2)           | 11 (15.7)          | 32 (56)                 | 8 (20.5)           |
| Higher                                             | 76 (43.9)                   | 16 (27.7)           | 0 (0)              | 19 (33.2)               | 24 (61.5)          |
| Don't know                                         | 9 (5.2)                     | 1 (1.7)             | 13 (18.6)          | 1 (1.8)                 | 4 (10.3)           |

**Supplementary Table S2 legend:** In the Czech Republic, 10/121 (8.3%) women and 16/79 (20.3%) men did not participate in the CVD-risk assessment ( $p = 0.014$ ). The mean (SD) age of participants who completed the CVD-risk assessment was 49.8 (8.9) years and of those who did not was 51.1 (7.5) ( $p = 0.292$ ). In Denmark, two (6.9%) women and two (6.1%) men did not complete the CVD-risk assessment ( $p = 0.894$ ). No statistically significant differences in age were observed between participants who completed versus those who did not complete the CVD-risk assessment [55.7 (6.4) vs. 55.8 (5.9) years,  $p = 0.950$ ]. In Greece, 20/64 (31.3%) females and 17/43 (39.5%) males did not complete the CVD-risk assessment ( $p = 0.377$ ). Mean (SD) age of participants who did not complete the CVD-risk assessment was 51.1 (7.7) years and of those who completed was 53.6 (8.9) years ( $p =$

0.170). In the Netherlands, 3/36 (8.3%) females and 4/30 (45.5%) males did not complete the CVD-risk assessment ( $p = 0.511$ ). Mean age of participants who did not complete the CVD-risk assessment was 61.1 (10.4) years and of those who completed was 53.2 (10.1) years ( $p = 0.378$ ). In Sweden, everyone (100%) completed the CVD-risk assessment. Gender differences between participants completing versus those not completing the CVD-risk assessment were examined through  $X^2$  tests, while age differences were examined through t-tests.
